# Supplementary material for: A colorimetric sensor for detecting thiourea based on inhibiting peroxidase-like activity of gold–platinum nanoparticles
Source: Royal Society of Chemistry journal article supplement (doi:10.1039/d0ay02283g), 2021-01-01
Supplement: d0ay02283g1.pdf [file d0ay02283g1.pdf]

## Supporting Information for:

# Colorimetric Sensor for Detecting Thiourea Based on Inhibiting Peroxidase-like Activity of Gold-platinum Nanoparticles

Yuqi Zhao<sup>1</sup>, Qingjie Fu<sup>1</sup>, Xiaoqian Cui<sup>2</sup>, Hui Chi<sup>1</sup>, Yongzhuang Lu<sup>1</sup>, Xiaoli Liu<sup>1</sup>, Miao Yu<sup>1</sup>,

Qiang Fei<sup>1</sup>, Guodong Feng<sup>1</sup>, Hongyan Shan<sup>1</sup>, and Yanfu Huan<sup>1\*</sup>

1. College of Chemistry, Jilin University, Changchun 130023, People's Republic of China

2. Department of Emergency and Critical Care, the Second Hospital of Jilin University, Changchun 130041,

People's Republic of China

\*. Corresponding author: E-mail address: [yfhuan@jlu.edu.cn](mailto:yfhuan@jlu.edu.cn)

---

## Table of contents

|                                                                                                         |   |
|---------------------------------------------------------------------------------------------------------|---|
| Table S1 Sources of other reagents.....                                                                 | 3 |
| Fig. S1 TEM (A) and DLS (B) characterizations of AuNPs. ....                                            | 4 |
| Fig. S2 Energy dispersive X-ray spectroscopy (EDX) characterization of AuNPs (a) and Au@PtNPs (b). .... | 5 |
| Fig. S3 Reaction time of the sensor for detecting TU.....                                               | 6 |
| Calculation of the limit of detection .....                                                             | 7 |
| Table S2 Comparison with other sensors for TU detection.....                                            | 8 |

---

† To whom correspondence should be addressed.

E-mail: [yfhuan@jlu.edu.cn](mailto:yfhuan@jlu.edu.cn)

Table S1 Sources of other reagents

| Reagent                                           | Source                                               |
|---------------------------------------------------|------------------------------------------------------|
| Potassium hexachloroplatinate (IV)                | Aladdin Industrial Corporation                       |
| Ascorbic acid                                     | Beijing Chemical Works                               |
| 3,3',5,5'-Tetramethylbenzidine<br>dihydrochloride | Shanghai Aladdin Biochemical<br>Technonlgy Co., Ltd. |
| Hydrogen peroxide                                 | Beijing Chemical Works                               |
| Citric acid                                       | Shenyang Xinxing Reagent Factory                     |
| Sodium citrate                                    | Tianjin Guangfu Fine Chemical Research<br>Institute  |

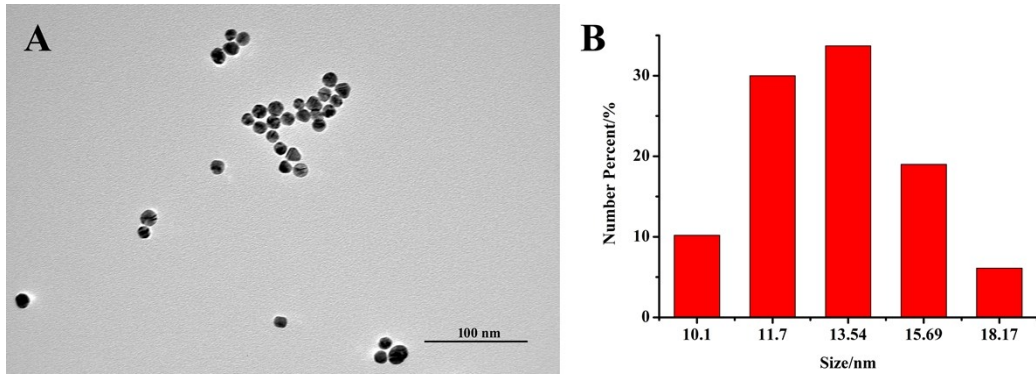

Fig. S1 TEM (A) and DLS (B) characterizations of AuNPs.

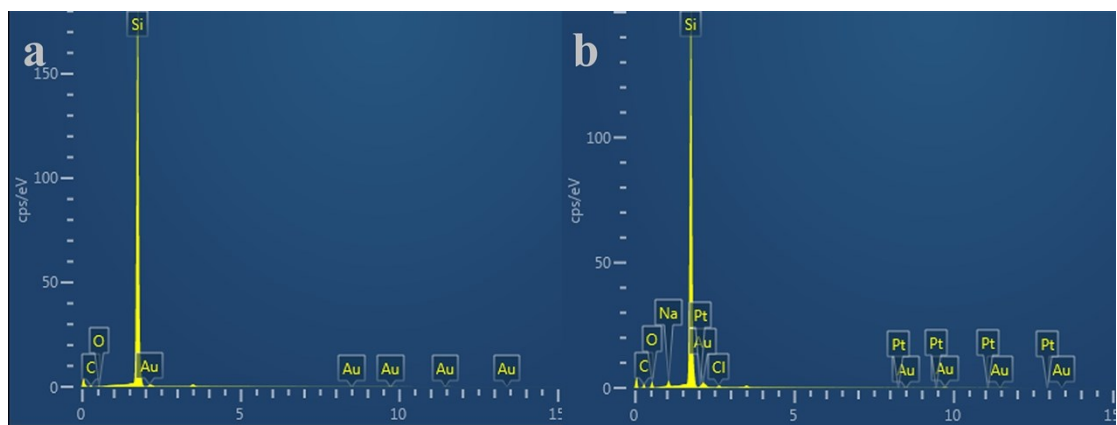

Fig. S2 Energy dispersive X-ray spectroscopy (EDX) characterization of AuNPs (a) and Au@PtNPs (b).

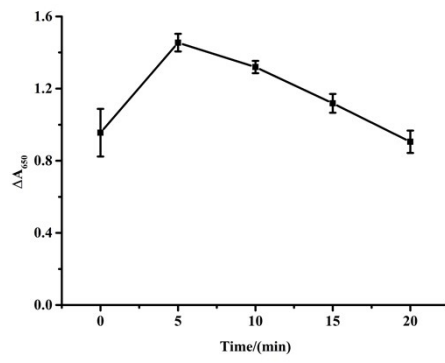

Fig. S3 Reaction time of the sensor for detecting TU

### Calculation of the limit of detection

The limit of detection (LOD) of the colorimetric sensor is 9.57 nmol L<sup>-1</sup>. The calculation process is as follows. First, the blank sample is used to make 11 sets of data in parallel, and the standard deviation of these data is obtained. The standard deviation measured experimentally is 0.0075. Finally, according to the calculation formula of the detection limit:

$$y = (3S_b + 0.859) / 0.445 = (3 \times 0.0075 + 0.859) / 0.445 = 1.981$$

$$\text{LOD} = 10^y = 95.7 \times 10^{-10} \text{ mol L}^{-1} = 9.57 \text{ nmol L}^{-1}$$

$S_b$  stands for the standard deviation.

Therefore, the LOD of SCN<sup>-</sup> based on gold nanoparticle colorimetric sensor is 9.57 nmol L<sup>-1</sup>.

Table S2 Comparison with other sensors for TU detection

| No. | Probe             | Linear range/(mol L <sup>-1</sup> )          | LOD/(mol L <sup>-1</sup> ) | Time/(min) | Ref.      |
|-----|-------------------|----------------------------------------------|----------------------------|------------|-----------|
| 1   | Citrate/AgNPs     | 2.00×10 <sup>-9</sup> -2.00×10 <sup>-8</sup> | 8.00×10 <sup>-10</sup>     | immediate  | 5         |
| 2   | Citrate/AuNPs     | 5.00×10 <sup>-9</sup> -3.50×10 <sup>-7</sup> | 2.14×10 <sup>-9</sup>      | 45         | 6         |
| 3   | Fluorescein/AuNPs | 5.00×10 <sup>-8</sup> -3.00×10 <sup>-6</sup> | 2.30×10 <sup>-8</sup>      | 3          | 8         |
| 4   | Fluorescence      | 9.00×10 <sup>-7</sup> -1.00×10 <sup>-6</sup> | 1.50×10 <sup>-7</sup>      | --         | 4         |
| 5   | Au@PtNPs          | 1.00×10 <sup>-8</sup> -1.00×10 <sup>-5</sup> | 9.57×10 <sup>-9</sup>      | 5          | This work |
